# Supplementary material
Source: publisher figshare collection journal article supplement (https://acs.figshare.com/ndownloader/files/3798640)
Supplement: Supplementary file 1 [file 3798640]

data_jiangkan1215
_audit_creation_date              2014-12-15
_audit_creation_method
;
Olex2 1.2
(compiled 2014.11.28 svn.r3106 for OlexSys, GUI svn.r4959)
;
_publ_contact_author_address      ?
_publ_contact_author_email        ?
_publ_contact_author_name         ''
_publ_contact_author_phone        ?
_publ_section_references
;
Dolomanov, O.V., Bourhis, L.J., Gildea, R.J, Howard, J.A.K. & Puschmann, H.
 (2009), J. Appl. Cryst. 42, 339-341.

Sheldrick, G.M. (2008). Acta Cryst. A64, 112-122.
;
_chemical_name_common             ?
_chemical_name_systematic
;
 ? 
;
_chemical_formula_moiety          'C20 H30 O2, 0.5(C2 H3 N)'
_chemical_formula_sum             'C21 H31.50 N0.50 O2'
_chemical_formula_weight          322.97
_chemical_absolute_configuration  unk
_chemical_melting_point           ?
loop_
  _atom_type_symbol
  _atom_type_description
  _atom_type_scat_dispersion_real
  _atom_type_scat_dispersion_imag
  _atom_type_scat_source
 'C' 'C' 0.0181 0.0091 'International Tables Vol C Tables 4.2.6.8 and 6.1.1.4'
 'H' 'H' 0.0000 0.0000 'International Tables Vol C Tables 4.2.6.8 and 6.1.1.4'
 'N' 'N' 0.0311 0.0180 'International Tables Vol C Tables 4.2.6.8 and 6.1.1.4'
 'O' 'O' 0.0492 0.0322 'International Tables Vol C Tables 4.2.6.8 and 6.1.1.4'

_space_group_crystal_system       'orthorhombic'
_space_group_IT_number            19
_space_group_name_H-M_alt         'P 21 21 21'
_space_group_name_Hall            'P 2ac 2ab'
loop_
  _space_group_symop_id
  _space_group_symop_operation_xyz
 1 'x, y, z'
 2 '-x+1/2, -y, z+1/2'
 3 'x+1/2, -y+1/2, -z'
 4 '-x, y+1/2, -z+1/2'

_cell_length_a                    6.3147(2)
_cell_length_b                    23.2682(9)
_cell_length_c                    25.4495(11)
_cell_angle_alpha                 90.00
_cell_angle_beta                  90.00
_cell_angle_gamma                 90.00
_cell_volume                      3739.3(2)
_cell_formula_units_Z             8
_cell_measurement_reflns_used     3653
_cell_measurement_temperature     290.92(10)
_cell_measurement_theta_max       69.3170
_cell_measurement_theta_min       5.5490
_exptl_absorpt_coefficient_mu     0.557
_exptl_absorpt_correction_T_max   1.00000
_exptl_absorpt_correction_T_min   0.66000
_exptl_absorpt_correction_type    multi-scan
_exptl_absorpt_process_details
;
CrysAlisPro, Agilent Technologies,
Version 1.171.36.32 (release 02-08-2013 CrysAlis171 .NET)
(compiled Aug  2 2013,16:46:58)
Empirical absorption correction using spherical harmonics,
 implemented in SCALE3 ABSPACK scaling algorithm.
;
_exptl_crystal_colour             'clear light colourless'
_exptl_crystal_density_diffrn     1.147
_exptl_crystal_density_meas       ?
_exptl_crystal_density_method     'not measured'
_exptl_crystal_description        block
_exptl_crystal_F_000              1416
_exptl_crystal_size_max           0.25
_exptl_crystal_size_mid           0.24
_exptl_crystal_size_min           0.15
_exptl_special_details
;
 ? 
;
_diffrn_reflns_av_R_equivalents   0.0289
_diffrn_reflns_av_unetI/netI      0.0423
_diffrn_reflns_limit_h_max        6
_diffrn_reflns_limit_h_min        -7
_diffrn_reflns_limit_k_max        28
_diffrn_reflns_limit_k_min        -22
_diffrn_reflns_limit_l_max        30
_diffrn_reflns_limit_l_min        -29
_diffrn_reflns_number             13994
_diffrn_reflns_theta_full         69.70
_diffrn_reflns_theta_max          69.70
_diffrn_reflns_theta_min          3.47
_diffrn_ambient_temperature       290.92(10)
_diffrn_detector_area_resol_mean  16.0733
_diffrn_measured_fraction_theta_full 0.992
_diffrn_measured_fraction_theta_max 0.992
_diffrn_measurement_details
;
#__ type_ start__ end____ width___ exp.time_
  1 omega   -9.00   81.00   1.0000    6.0000
omega____ theta____ kappa____ phi______ frames
    -       54.0000  -78.0000 -160.0000 90

#__ type_ start__ end____ width___ exp.time_
  2 omega   50.00  131.00   1.0000   12.0000
omega____ theta____ kappa____ phi______ frames
    -      108.0000  -62.0000   67.0000 81

#__ type_ start__ end____ width___ exp.time_
  3 omega  116.00  142.00   1.0000   12.0000
omega____ theta____ kappa____ phi______ frames
    -      108.0000  -82.0000  -46.0000 26

#__ type_ start__ end____ width___ exp.time_
  4 omega   37.00  130.00   1.0000   12.0000
omega____ theta____ kappa____ phi______ frames
    -      108.0000  -78.0000 -160.0000 93

#__ type_ start__ end____ width___ exp.time_
  5 omega   66.00   93.00   1.0000   12.0000
omega____ theta____ kappa____ phi______ frames
    -      108.0000  -82.0000  -46.0000 27

#__ type_ start__ end____ width___ exp.time_
  6 omega  -22.00    3.00   1.0000    4.0000
omega____ theta____ kappa____ phi______ frames
    -        0.0000  -82.0000  -46.0000 25

#__ type_ start__ end____ width___ exp.time_
  7 omega  -54.00   20.00   1.0000    4.0000
omega____ theta____ kappa____ phi______ frames
    -        0.0000  -57.0000  120.0000 74

#__ type_ start__ end____ width___ exp.time_
  8 omega    8.00   33.00   1.0000    6.0000
omega____ theta____ kappa____ phi______ frames
    -       54.0000  -62.0000   67.0000 25

#__ type_ start__ end____ width___ exp.time_
  9 omega   50.00  123.00   1.0000    6.0000
omega____ theta____ kappa____ phi______ frames
    -       54.0000   57.0000   60.0000 73

#__ type_ start__ end____ width___ exp.time_
 10 omega   40.00  105.00   1.0000    6.0000
omega____ theta____ kappa____ phi______ frames
    -       54.0000   57.0000  -60.0000 65

#__ type_ start__ end____ width___ exp.time_
 11 omega   85.00  173.00   1.0000   12.0000
omega____ theta____ kappa____ phi______ frames
    -      108.0000   63.0000 -120.0000 88

#__ type_ start__ end____ width___ exp.time_
 12 omega  150.00  176.00   1.0000   12.0000
omega____ theta____ kappa____ phi______ frames
    -      108.0000   38.0000   30.0000 26

#__ type_ start__ end____ width___ exp.time_
 13 omega   93.00  119.00   1.0000   12.0000
omega____ theta____ kappa____ phi______ frames
    -      108.0000   38.0000   30.0000 26

#__ type_ start__ end____ width___ exp.time_
 14 omega   86.00  114.00   1.0000   12.0000
omega____ theta____ kappa____ phi______ frames
    -      108.0000 -111.0000  -60.0000 28

#__ type_ start__ end____ width___ exp.time_
 15 omega   37.00   68.00   1.0000   12.0000
omega____ theta____ kappa____ phi______ frames
    -      108.0000 -111.0000  -60.0000 31

#__ type_ start__ end____ width___ exp.time_
 16 omega   42.00   67.00   1.0000   12.0000
omega____ theta____ kappa____ phi______ frames
    -      108.0000  -38.0000 -180.0000 25

#__ type_ start__ end____ width___ exp.time_
 17 omega  123.00  177.00   1.0000   12.0000
omega____ theta____ kappa____ phi______ frames
    -      108.0000   38.0000  -90.0000 54
;
_diffrn_measurement_device_type   'SuperNova, Dual, Cu at zero, Eos'
_diffrn_measurement_method        '\w scans'
_diffrn_orient_matrix_UB_11       -0.0269127000
_diffrn_orient_matrix_UB_12       0.0343669000
_diffrn_orient_matrix_UB_13       -0.0513057000
_diffrn_orient_matrix_UB_21       -0.2039142000
_diffrn_orient_matrix_UB_22       -0.0337450000
_diffrn_orient_matrix_UB_23       -0.0123316000
_diffrn_orient_matrix_UB_31       -0.1312463000
_diffrn_orient_matrix_UB_32       0.0454053000
_diffrn_orient_matrix_UB_33       0.0296840000
_diffrn_radiation_monochromator   mirror
_diffrn_radiation_type            CuK\a
_diffrn_radiation_wavelength      1.54184
_diffrn_source                    'SuperNova (Cu) X-ray Source'
_diffrn_standards_decay_%         ?
_diffrn_standards_interval_count  ?
_diffrn_standards_interval_time   ?
_diffrn_standards_number          ?
_reflns_number_gt                 5562
_reflns_number_total              6951
_reflns_odcompleteness_completeness 99.92
_reflns_odcompleteness_iscentric  1
_reflns_odcompleteness_theta      66.97
_reflns_threshold_expression      >2sigma(I)
_computing_cell_refinement
;
CrysAlisPro, Agilent Technologies,
Version 1.171.36.32 (release 02-08-2013 CrysAlis171 .NET)
(compiled Aug  2 2013,16:46:58)
;
_computing_data_collection
;
CrysAlisPro, Agilent Technologies,
Version 1.171.36.32 (release 02-08-2013 CrysAlis171 .NET)
(compiled Aug  2 2013,16:46:58)
;
_computing_data_reduction
;
CrysAlisPro, Agilent Technologies,
Version 1.171.36.32 (release 02-08-2013 CrysAlis171 .NET)
(compiled Aug  2 2013,16:46:58)
;
_computing_molecular_graphics     'Olex2 (Dolomanov et al., 2009)'
_computing_publication_material   'Olex2 (Dolomanov et al., 2009)'
_computing_structure_refinement   'ShelXL (Sheldrick, 2008)'
_computing_structure_solution     'ShelXS (Sheldrick, 2008)'
_refine_diff_density_max          0.171
_refine_diff_density_min          -0.173
_refine_diff_density_rms          0.034
_refine_ls_abs_structure_details  'Flack H D (1983), Acta Cryst. A39, 876-881'
_refine_ls_abs_structure_Flack    0.0(2)
_refine_ls_extinction_coef        ?
_refine_ls_extinction_method      none
_refine_ls_goodness_of_fit_ref    1.054
_refine_ls_hydrogen_treatment     mixed
_refine_ls_matrix_type            full
_refine_ls_number_parameters      451
_refine_ls_number_reflns          6951
_refine_ls_number_restraints      0
_refine_ls_R_factor_all           0.0641
_refine_ls_R_factor_gt            0.0478
_refine_ls_restrained_S_all       1.054
_refine_ls_shift/su_max           0.000
_refine_ls_shift/su_mean          0.000
_refine_ls_structure_factor_coef  Fsqd
_refine_ls_weighting_details
'calc w=1/[\s^2^(Fo^2^)+(0.0582P)^2^+0.0608P] where P=(Fo^2^+2Fc^2^)/3'
_refine_ls_weighting_scheme       calc
_refine_ls_wR_factor_gt           0.1146
_refine_ls_wR_factor_ref          0.1259
_refine_special_details
;
 Refinement of F^2^ against ALL reflections.  The weighted R-factor wR and 
 goodness of fit S are based on F^2^, conventional R-factors R are based 
 on F, with F set to zero for negative F^2^. The threshold expression of 
 F^2^ > 2sigma(F^2^) is used only for calculating R-factors(gt) etc. and is 
 not relevant to the choice of reflections for refinement.  R-factors based 
 on F^2^ are statistically about twice as large as those based on F, and R- 
 factors based on ALL data will be even larger. 
;
_olex2_refinement_description
;
1. Fixed Uiso
 At 1.2 times of:
  All C(H) groups, All C(H,H) groups
 At 1.5 times of:
  All C(H,H,H) groups, All O(H) groups
2.a Ternary CH refined with riding coordinates:
 C5(H5), C9(H9), C12(H12), C5'(HB), C9'(HL), C12'(HW)
2.b Secondary CH2 refined with riding coordinates:
 C1(H1A,H1B), C2(H2A,H2B), C3(H3A,H3B), C6(H6A,H6B), C11(H11A,H11B), C1'(HI,
 HJ), C2'(HO,HP), C3'(HM,HN), C6'(HD,HE), C11'(H,HA)
2.c Aromatic/amide H refined with riding coordinates:
 C14(H14), C15(H15), C14'(HK), C15'(H0AA)
2.d Idealised Me refined as rotating group:
 C17(H17A,H17B,H17C), C18(H18A,H18B,H18C), C19(H19A,H19B,H19C), C20(H20A,H20B,
 H20C), C17'(HQ,HR,HS), C18'(HX,HY,HZ), C19'(HT,HU,HV), C20'(HF,HG,HH),
 C22(H1AA,H2AA,H3AA)
2.e Idealised tetrahedral OH refined as rotating group:
 O2(H2), O2'(HC)
;
_atom_sites_solution_hydrogens    geom
_atom_sites_solution_primary      direct
_atom_sites_solution_secondary    difmap
loop_
  _atom_site_label
  _atom_site_type_symbol
  _atom_site_fract_x
  _atom_site_fract_y
  _atom_site_fract_z
  _atom_site_U_iso_or_equiv
  _atom_site_adp_type
  _atom_site_occupancy
  _atom_site_calc_flag
  _atom_site_disorder_assembly
  _atom_site_disorder_group
  _atom_site_refinement_flags_posn
 O1 O 0.5856(3) 0.90556(7) 0.20818(8) 0.0532(4) Uani 1 d . . .
 O2 O 0.2403(3) 1.14137(9) 0.11387(8) 0.0651(5) Uani 1 d . . .
 H2 H 0.3456 1.1598 0.1054 0.098 Uiso 1 calc . . GR
 C1 C 0.4566(4) 1.11628(10) 0.31265(10) 0.0489(6) Uani 1 d . . .
 H1A H 0.4899 1.1516 0.2942 0.059 Uiso 1 calc . . R
 H1B H 0.3038 1.1121 0.3127 0.059 Uiso 1 calc . . R
 C2 C 0.5327(5) 1.12145(11) 0.36893(11) 0.0593(7) Uani 1 d . . .
 H2A H 0.6827 1.1304 0.3692 0.071 Uiso 1 calc . . R
 H2B H 0.4583 1.1527 0.3861 0.071 Uiso 1 calc . . R
 C3 C 0.4951(5) 1.06625(12) 0.39899(11) 0.0598(7) Uani 1 d . . .
 H3A H 0.3438 1.0593 0.4011 0.072 Uiso 1 calc . . R
 H3B H 0.5480 1.0708 0.4345 0.072 Uiso 1 calc . . R
 C4 C 0.6023(4) 1.01368(11) 0.37377(10) 0.0518(6) Uani 1 d . . .
 C5 C 0.5304(3) 1.01007(9) 0.31576(9) 0.0414(5) Uani 1 d . . .
 H5 H 0.3775 1.0029 0.3174 0.050 Uiso 1 calc . . R
 C6 C 0.6225(4) 0.95774(9) 0.28708(9) 0.0459(5) Uani 1 d . . .
 H6A H 0.7755 0.9590 0.2904 0.055 Uiso 1 calc . . R
 H6B H 0.5741 0.9234 0.3050 0.055 Uiso 1 calc . . R
 C7 C 0.5694(3) 0.95206(9) 0.23020(10) 0.0421(5) Uani 1 d . . .
 C8 C 0.5024(3) 1.00426(9) 0.20057(9) 0.0399(5) Uani 1 d . . .
 C9 C 0.4228(3) 1.05559(9) 0.23156(9) 0.0396(5) Uani 1 d . . .
 H9 H 0.2793 1.0457 0.2432 0.048 Uiso 1 calc . . R
 C10 C 0.5541(3) 1.06550(8) 0.28227(9) 0.0397(5) Uani 1 d . . .
 C11 C 0.3997(4) 1.10846(10) 0.19616(10) 0.0498(6) Uani 1 d . . .
 H11A H 0.3105 1.1367 0.2134 0.060 Uiso 1 calc . . R
 H11B H 0.5377 1.1257 0.1905 0.060 Uiso 1 calc . . R
 C12 C 0.3032(4) 1.09227(11) 0.14373(10) 0.0502(6) Uani 1 d . . .
 H12 H 0.1734 1.0709 0.1516 0.060 Uiso 1 calc . . R
 C13 C 0.4461(4) 1.05131(11) 0.11199(10) 0.0506(6) Uani 1 d . . .
 C14 C 0.5136(3) 1.00351(10) 0.14856(10) 0.0475(5) Uani 1 d . . .
 H14 H 0.5682 0.9704 0.1331 0.057 Uiso 1 calc . . R
 C15 C 0.3180(6) 1.02447(14) 0.06816(12) 0.0756(9) Uani 1 d . . .
 H15 H 0.1846 1.0115 0.0782 0.091 Uiso 1 calc . . R
 C16 C 0.3615(13) 1.0168(3) 0.02070(18) 0.139(2) Uani 1 d . . .
 H16A H 0.261(7) 0.9901(18) -0.0013(16) 0.111(14) Uiso 1 d . . .
 H16B H 0.518(13) 1.028(3) 0.003(3) 0.25(4) Uiso 1 d . . .
 C17 C 0.6445(5) 1.08190(14) 0.09103(14) 0.0763(9) Uani 1 d . . .
 H17A H 0.7270 1.0959 0.1200 0.114 Uiso 1 calc . . GR
 H17B H 0.6029 1.1135 0.0691 0.114 Uiso 1 calc . . GR
 H17C H 0.7277 1.0553 0.0709 0.114 Uiso 1 calc . . GR
 C18 C 0.8447(5) 1.01718(14) 0.38176(13) 0.0705(8) Uani 1 d . . .
 H18A H 0.8953 1.0537 0.3694 0.106 Uiso 1 calc . . GR
 H18B H 0.9122 0.9869 0.3624 0.106 Uiso 1 calc . . GR
 H18C H 0.8770 1.0131 0.4184 0.106 Uiso 1 calc . . GR
 C19 C 0.5240(6) 0.96031(13) 0.40352(12) 0.0729(9) Uani 1 d . . .
 H19A H 0.5522 0.9648 0.4404 0.109 Uiso 1 calc . . GR
 H19B H 0.5963 0.9269 0.3906 0.109 Uiso 1 calc . . GR
 H19C H 0.3743 0.9559 0.3982 0.109 Uiso 1 calc . . GR
 C20 C 0.7862(4) 1.07879(11) 0.26708(11) 0.0515(6) Uani 1 d . . .
 H20A H 0.7888 1.1086 0.2410 0.077 Uiso 1 calc . . GR
 H20B H 0.8513 1.0448 0.2531 0.077 Uiso 1 calc . . GR
 H20C H 0.8625 1.0912 0.2977 0.077 Uiso 1 calc . . GR
 O1' O 0.0819(3) 0.94618(6) 0.23316(7) 0.0484(4) Uani 1 d . . .
 O2' O 0.0980(3) 0.69631(8) 0.33792(9) 0.0674(5) Uani 1 d . . .
 HC H -0.0015 0.6858 0.3562 0.101 Uiso 1 calc . . GR
 C1' C -0.0417(4) 0.73017(10) 0.13772(10) 0.0508(6) Uani 1 d . . .
 HI H 0.0321 0.6973 0.1523 0.061 Uiso 1 calc . . R
 HJ H -0.1886 0.7278 0.1486 0.061 Uiso 1 calc . . R
 C2' C -0.0314(5) 0.72712(12) 0.07839(11) 0.0646(7) Uani 1 d . . .
 HO H -0.0964 0.6917 0.0664 0.077 Uiso 1 calc . . R
 HP H 0.1154 0.7271 0.0672 0.077 Uiso 1 calc . . R
 C3' C -0.1455(5) 0.77809(13) 0.05425(11) 0.0673(8) Uani 1 d . . .
 HM H -0.2940 0.7763 0.0639 0.081 Uiso 1 calc . . R
 HN H -0.1368 0.7752 0.0163 0.081 Uiso 1 calc . . R
 C4' C -0.0558(4) 0.83650(12) 0.07143(10) 0.0533(6) Uani 1 d . . .
 C5' C -0.0447(3) 0.83812(9) 0.13259(9) 0.0413(5) Uani 1 d . . .
 HB H -0.1926 0.8384 0.1442 0.050 Uiso 1 calc . . R
 C6' C 0.0499(4) 0.89393(9) 0.15390(9) 0.0454(5) Uani 1 d . . .
 HD H 0.1910 0.8983 0.1394 0.054 Uiso 1 calc . . R
 HE H -0.0348 0.9257 0.1410 0.054 Uiso 1 calc . . R
 C7' C 0.0652(3) 0.89904(9) 0.21226(10) 0.0401(5) Uani 1 d . . .
 C8' C 0.0717(3) 0.84526(9) 0.24414(8) 0.0376(4) Uani 1 d . . .
 C9' C -0.0073(3) 0.79007(9) 0.21913(9) 0.0392(5) Uani 1 d . . .
 HL H -0.1623 0.7917 0.2201 0.047 Uiso 1 calc . . R
 C10' C 0.0563(3) 0.78562(9) 0.16036(9) 0.0397(5) Uani 1 d . . .
 C11' C 0.0578(4) 0.73780(10) 0.25216(10) 0.0514(6) Uani 1 d . . .
 H H -0.0308 0.7054 0.2425 0.062 Uiso 1 calc . . R
 HA H 0.2030 0.7278 0.2438 0.062 Uiso 1 calc . . R
 C12' C 0.0403(4) 0.74730(10) 0.31029(10) 0.0497(6) Uani 1 d . . .
 HW H -0.1074 0.7564 0.3187 0.060 Uiso 1 calc . . R
 C13' C 0.1808(4) 0.79754(11) 0.32888(10) 0.0499(5) Uani 1 d . . .
 C14' C 0.1493(3) 0.84777(10) 0.29265(9) 0.0443(5) Uani 1 d . . .
 HK H 0.1874 0.8838 0.3053 0.053 Uiso 1 calc . . R
 C15' C 0.1245(5) 0.81131(14) 0.38491(12) 0.0702(8) Uani 1 d . . .
 H0AA H 0.1644 0.7838 0.4095 0.084 Uiso 1 calc . . R
 C16' C 0.0309(8) 0.8549(2) 0.40352(17) 0.0978(13) Uani 1 d . . .
 H4AA H 0.002(5) 0.8524(15) 0.4413(14) 0.083(11) Uiso 1 d . . .
 H5AA H 0.003(9) 0.894(2) 0.381(2) 0.16(2) Uiso 1 d . . .
 C17' C 0.4186(4) 0.78099(13) 0.32697(13) 0.0676(7) Uani 1 d . . .
 HQ H 0.4596 0.7739 0.2912 0.101 Uiso 1 calc . . GR
 HR H 0.4414 0.7469 0.3475 0.101 Uiso 1 calc . . GR
 HS H 0.5020 0.8119 0.3410 0.101 Uiso 1 calc . . GR
 C18' C 0.1545(5) 0.84816(14) 0.04337(11) 0.0669(7) Uani 1 d . . .
 HX H 0.2134 0.8837 0.0559 0.100 Uiso 1 calc . . GR
 HY H 0.1305 0.8508 0.0062 0.100 Uiso 1 calc . . GR
 HZ H 0.2515 0.8173 0.0505 0.100 Uiso 1 calc . . GR
 C19' C -0.2140(5) 0.88316(14) 0.05314(12) 0.0723(9) Uani 1 d . . .
 HT H -0.3395 0.8814 0.0744 0.108 Uiso 1 calc . . GR
 HU H -0.2508 0.8767 0.0170 0.108 Uiso 1 calc . . GR
 HV H -0.1501 0.9204 0.0567 0.108 Uiso 1 calc . . GR
 C20' C 0.3001(3) 0.78366(11) 0.15562(10) 0.0490(5) Uani 1 d . . .
 HF H 0.3394 0.7826 0.1192 0.074 Uiso 1 calc . . GR
 HG H 0.3528 0.7499 0.1730 0.074 Uiso 1 calc . . GR
 HH H 0.3598 0.8173 0.1718 0.074 Uiso 1 calc . . GR
 N1 N 0.5450(5) 0.72365(14) 0.46063(13) 0.0931(9) Uani 1 d . . .
 C21 C 0.5405(5) 0.76774(15) 0.47829(13) 0.0702(8) Uani 1 d . . .
 C22 C 0.5331(6) 0.82484(16) 0.49999(17) 0.0945(12) Uani 1 d . . .
 H1AA H 0.6113 0.8258 0.5323 0.142 Uiso 1 calc . . GR
 H2AA H 0.3885 0.8354 0.5066 0.142 Uiso 1 calc . . GR
 H3AA H 0.5945 0.8515 0.4755 0.142 Uiso 1 calc . . GR

loop_
  _atom_site_aniso_label
  _atom_site_aniso_U_11
  _atom_site_aniso_U_22
  _atom_site_aniso_U_33
  _atom_site_aniso_U_23
  _atom_site_aniso_U_13
  _atom_site_aniso_U_12
 O1 0.0520(8) 0.0347(8) 0.0728(12) -0.0127(8) 0.0019(8) 0.0048(7)
 O2 0.0759(12) 0.0583(12) 0.0611(12) 0.0072(9) 0.0040(10) 0.0165(9)
 C1 0.0563(13) 0.0365(11) 0.0539(14) -0.0070(10) 0.0049(11) 0.0032(10)
 C2 0.0679(16) 0.0488(14) 0.0612(16) -0.0154(12) 0.0016(13) 0.0029(12)
 C3 0.0719(17) 0.0605(17) 0.0469(15) -0.0079(12) 0.0022(12) 0.0032(13)
 C4 0.0584(14) 0.0467(13) 0.0504(14) 0.0018(11) 0.0031(11) 0.0003(11)
 C5 0.0397(10) 0.0339(11) 0.0507(13) -0.0020(9) 0.0055(9) -0.0017(8)
 C6 0.0513(12) 0.0325(11) 0.0541(14) 0.0021(10) 0.0065(10) 0.0022(9)
 C7 0.0330(9) 0.0319(10) 0.0614(14) -0.0052(10) 0.0063(10) -0.0021(8)
 C8 0.0372(10) 0.0325(10) 0.0501(13) -0.0051(9) 0.0053(9) -0.0030(8)
 C9 0.0391(10) 0.0322(10) 0.0475(12) -0.0046(9) 0.0078(9) 0.0042(9)
 C10 0.0417(10) 0.0305(10) 0.0468(12) -0.0041(9) 0.0057(10) -0.0015(8)
 C11 0.0632(14) 0.0355(11) 0.0506(14) -0.0033(10) 0.0037(11) 0.0076(10)
 C12 0.0514(13) 0.0464(13) 0.0528(14) 0.0037(11) 0.0038(11) 0.0069(11)
 C13 0.0567(13) 0.0476(13) 0.0473(14) -0.0035(11) 0.0070(11) 0.0008(11)
 C14 0.0448(11) 0.0399(12) 0.0580(15) -0.0098(11) 0.0080(10) -0.0003(9)
 C15 0.095(2) 0.070(2) 0.0620(19) -0.0090(15) -0.0126(17) 0.0061(18)
 C16 0.181(6) 0.172(6) 0.064(3) -0.029(3) -0.025(3) 0.004(5)
 C17 0.0738(18) 0.0697(19) 0.085(2) 0.0095(16) 0.0307(17) 0.0025(16)
 C18 0.0677(16) 0.0726(19) 0.0713(19) 0.0007(16) -0.0158(15) 0.0041(15)
 C19 0.098(2) 0.0642(18) 0.0565(17) 0.0107(14) 0.0121(16) 0.0015(16)
 C20 0.0450(12) 0.0456(13) 0.0639(16) 0.0001(11) 0.0034(11) -0.0097(10)
 O1' 0.0493(8) 0.0326(8) 0.0635(10) -0.0075(7) 0.0059(8) -0.0042(7)
 O2' 0.0686(12) 0.0563(11) 0.0773(14) 0.0254(10) 0.0060(10) 0.0029(9)
 C1' 0.0533(13) 0.0388(12) 0.0603(15) -0.0105(10) 0.0031(11) -0.0044(10)
 C2' 0.0736(17) 0.0585(16) 0.0616(17) -0.0242(13) -0.0006(14) -0.0052(14)
 C3' 0.0712(17) 0.077(2) 0.0540(16) -0.0161(14) -0.0052(14) -0.0041(15)
 C4' 0.0567(14) 0.0519(14) 0.0514(14) -0.0034(11) 0.0033(12) 0.0061(12)
 C5' 0.0354(10) 0.0409(11) 0.0475(12) -0.0028(9) 0.0052(9) 0.0003(9)
 C6' 0.0487(11) 0.0365(11) 0.0508(14) 0.0033(10) 0.0056(10) 0.0004(10)
 C7' 0.0311(9) 0.0324(10) 0.0567(13) -0.0029(9) 0.0070(9) -0.0002(8)
 C8' 0.0340(9) 0.0319(10) 0.0470(12) -0.0031(9) 0.0031(9) -0.0004(8)
 C9' 0.0360(10) 0.0332(10) 0.0486(12) -0.0016(9) 0.0023(9) -0.0031(8)
 C10' 0.0367(10) 0.0328(10) 0.0495(13) -0.0066(9) 0.0037(9) -0.0037(9)
 C11' 0.0566(14) 0.0353(11) 0.0624(16) 0.0006(11) 0.0021(12) -0.0051(10)
 C12' 0.0458(12) 0.0432(13) 0.0602(15) 0.0112(11) 0.0019(11) 0.0014(10)
 C13' 0.0481(12) 0.0522(14) 0.0493(13) 0.0044(11) -0.0023(11) 0.0003(10)
 C14' 0.0434(11) 0.0372(11) 0.0524(13) -0.0040(10) 0.0012(10) -0.0022(9)
 C15' 0.082(2) 0.0714(19) 0.0570(17) 0.0010(15) -0.0086(15) 0.0077(16)
 C16' 0.117(3) 0.100(3) 0.076(3) 0.002(2) 0.024(2) 0.022(3)
 C17' 0.0516(13) 0.0683(17) 0.083(2) 0.0158(15) -0.0073(14) 0.0027(13)
 C18' 0.0722(17) 0.078(2) 0.0499(15) -0.0021(14) 0.0131(14) 0.0032(16)
 C19' 0.0774(19) 0.086(2) 0.0540(16) 0.0052(15) -0.0075(15) 0.0224(17)
 C20' 0.0386(11) 0.0457(12) 0.0627(15) -0.0031(11) 0.0079(10) 0.0024(10)
 N1 0.093(2) 0.086(2) 0.100(2) -0.0211(19) -0.0166(18) 0.0114(18)
 C21 0.0667(17) 0.079(2) 0.0652(18) -0.0076(16) -0.0074(15) 0.0015(15)
 C22 0.090(2) 0.083(2) 0.110(3) -0.020(2) 0.007(2) -0.011(2)

_geom_special_details
;
 All esds (except the esd in the dihedral angle between two l.s. planes) 
 are estimated using the full covariance matrix.  The cell esds are taken 
 into account individually in the estimation of esds in distances, angles 
 and torsion angles; correlations between esds in cell parameters are only 
 used when they are defined by crystal symmetry.  An approximate (isotropic) 
 treatment of cell esds is used for estimating esds involving l.s. planes. 
;
loop_
  _geom_bond_atom_site_label_1
  _geom_bond_atom_site_label_2
  _geom_bond_distance
  _geom_bond_site_symmetry_2
  _geom_bond_publ_flag
 O1 C7 1.223(3) . ?
 O2 H2 0.8200 . ?
 O2 C12 1.428(3) . ?
 C1 H1A 0.9700 . ?
 C1 H1B 0.9700 . ?
 C1 C2 1.516(4) . ?
 C1 C10 1.540(3) . ?
 C2 H2A 0.9700 . ?
 C2 H2B 0.9700 . ?
 C2 C3 1.514(4) . ?
 C3 H3A 0.9700 . ?
 C3 H3B 0.9700 . ?
 C3 C4 1.538(4) . ?
 C4 C5 1.547(3) . ?
 C4 C18 1.546(4) . ?
 C4 C19 1.536(4) . ?
 C5 H5 0.9800 . ?
 C5 C6 1.534(3) . ?
 C5 C10 1.553(3) . ?
 C6 H6A 0.9700 . ?
 C6 H6B 0.9700 . ?
 C6 C7 1.492(3) . ?
 C7 C8 1.491(3) . ?
 C8 C9 1.517(3) . ?
 C8 C14 1.326(3) . ?
 C9 H9 0.9800 . ?
 C9 C10 1.551(3) . ?
 C9 C11 1.532(3) . ?
 C10 C20 1.547(3) . ?
 C11 H11A 0.9700 . ?
 C11 H11B 0.9700 . ?
 C11 C12 1.514(3) . ?
 C12 H12 0.9800 . ?
 C12 C13 1.541(3) . ?
 C13 C14 1.512(3) . ?
 C13 C15 1.513(4) . ?
 C13 C17 1.536(4) . ?
 C14 H14 0.9300 . ?
 C15 H15 0.9300 . ?
 C15 C16 1.251(6) . ?
 C16 H16A 1.05(4) . ?
 C16 H16B 1.12(8) . ?
 C17 H17A 0.9600 . ?
 C17 H17B 0.9600 . ?
 C17 H17C 0.9600 . ?
 C18 H18A 0.9600 . ?
 C18 H18B 0.9600 . ?
 C18 H18C 0.9600 . ?
 C19 H19A 0.9600 . ?
 C19 H19B 0.9600 . ?
 C19 H19C 0.9600 . ?
 C20 H20A 0.9600 . ?
 C20 H20B 0.9600 . ?
 C20 H20C 0.9600 . ?
 O1' C7' 1.224(3) . ?
 O2' HC 0.8200 . ?
 O2' C12' 1.426(3) . ?
 C1' HI 0.9700 . ?
 C1' HJ 0.9700 . ?
 C1' C2' 1.513(4) . ?
 C1' C10' 1.543(3) . ?
 C2' HO 0.9700 . ?
 C2' HP 0.9700 . ?
 C2' C3' 1.518(4) . ?
 C3' HM 0.9700 . ?
 C3' HN 0.9700 . ?
 C3' C4' 1.536(4) . ?
 C4' C5' 1.558(3) . ?
 C4' C18' 1.532(4) . ?
 C4' C19' 1.547(4) . ?
 C5' HB 0.9800 . ?
 C5' C6' 1.529(3) . ?
 C5' C10' 1.549(3) . ?
 C6' HD 0.9700 . ?
 C6' HE 0.9700 . ?
 C6' C7' 1.493(3) . ?
 C7' C8' 1.492(3) . ?
 C8' C9' 1.517(3) . ?
 C8' C14' 1.330(3) . ?
 C9' HL 0.9800 . ?
 C9' C10' 1.552(3) . ?
 C9' C11' 1.534(3) . ?
 C10' C20' 1.545(3) . ?
 C11' H 0.9700 . ?
 C11' HA 0.9700 . ?
 C11' C12' 1.500(4) . ?
 C12' HW 0.9800 . ?
 C12' C13' 1.542(3) . ?
 C13' C14' 1.502(3) . ?
 C13' C15' 1.504(4) . ?
 C13' C17' 1.551(4) . ?
 C14' HK 0.9300 . ?
 C15' H0AA 0.9300 . ?
 C15' C16' 1.265(5) . ?
 C16' H4AA 0.98(3) . ?
 C16' H5AA 1.10(5) . ?
 C17' HQ 0.9600 . ?
 C17' HR 0.9600 . ?
 C17' HS 0.9600 . ?
 C18' HX 0.9600 . ?
 C18' HY 0.9600 . ?
 C18' HZ 0.9600 . ?
 C19' HT 0.9600 . ?
 C19' HU 0.9600 . ?
 C19' HV 0.9600 . ?
 C20' HF 0.9600 . ?
 C20' HG 0.9600 . ?
 C20' HH 0.9600 . ?
 N1 C21 1.120(4) . ?
 C21 C22 1.440(5) . ?
 C22 H1AA 0.9600 . ?
 C22 H2AA 0.9600 . ?
 C22 H3AA 0.9600 . ?

loop_
  _geom_angle_atom_site_label_1
  _geom_angle_atom_site_label_2
  _geom_angle_atom_site_label_3
  _geom_angle
  _geom_angle_site_symmetry_1
  _geom_angle_site_symmetry_3
  _geom_angle_publ_flag
 C12 O2 H2 109.5 . . ?
 H1A C1 H1B 107.6 . . ?
 C2 C1 H1A 108.7 . . ?
 C2 C1 H1B 108.7 . . ?
 C2 C1 C10 114.1(2) . . ?
 C10 C1 H1A 108.7 . . ?
 C10 C1 H1B 108.7 . . ?
 C1 C2 H2A 109.4 . . ?
 C1 C2 H2B 109.4 . . ?
 H2A C2 H2B 108.0 . . ?
 C3 C2 C1 111.1(2) . . ?
 C3 C2 H2A 109.4 . . ?
 C3 C2 H2B 109.4 . . ?
 C2 C3 H3A 108.9 . . ?
 C2 C3 H3B 108.9 . . ?
 C2 C3 C4 113.3(2) . . ?
 H3A C3 H3B 107.7 . . ?
 C4 C3 H3A 108.9 . . ?
 C4 C3 H3B 108.9 . . ?
 C3 C4 C5 108.2(2) . . ?
 C3 C4 C18 109.8(2) . . ?
 C18 C4 C5 114.8(2) . . ?
 C19 C4 C3 107.2(2) . . ?
 C19 C4 C5 109.4(2) . . ?
 C19 C4 C18 107.2(3) . . ?
 C4 C5 H5 105.0 . . ?
 C4 C5 C10 116.77(18) . . ?
 C6 C5 C4 112.68(19) . . ?
 C6 C5 H5 105.0 . . ?
 C6 C5 C10 111.18(18) . . ?
 C10 C5 H5 105.0 . . ?
 C5 C6 H6A 108.2 . . ?
 C5 C6 H6B 108.2 . . ?
 H6A C6 H6B 107.3 . . ?
 C7 C6 C5 116.53(19) . . ?
 C7 C6 H6A 108.2 . . ?
 C7 C6 H6B 108.2 . . ?
 O1 C7 C6 120.3(2) . . ?
 O1 C7 C8 120.8(2) . . ?
 C8 C7 C6 118.84(18) . . ?
 C7 C8 C9 118.2(2) . . ?
 C14 C8 C7 118.6(2) . . ?
 C14 C8 C9 123.2(2) . . ?
 C8 C9 H9 106.2 . . ?
 C8 C9 C10 111.85(18) . . ?
 C8 C9 C11 110.98(19) . . ?
 C10 C9 H9 106.2 . . ?
 C11 C9 H9 106.2 . . ?
 C11 C9 C10 114.88(18) . . ?
 C1 C10 C5 108.83(18) . . ?
 C1 C10 C9 108.54(18) . . ?
 C1 C10 C20 110.53(19) . . ?
 C9 C10 C5 106.35(17) . . ?
 C20 C10 C5 113.24(19) . . ?
 C20 C10 C9 109.18(19) . . ?
 C9 C11 H11A 109.5 . . ?
 C9 C11 H11B 109.5 . . ?
 H11A C11 H11B 108.0 . . ?
 C12 C11 C9 110.90(19) . . ?
 C12 C11 H11A 109.5 . . ?
 C12 C11 H11B 109.5 . . ?
 O2 C12 C11 112.4(2) . . ?
 O2 C12 H12 106.4 . . ?
 O2 C12 C13 112.3(2) . . ?
 C11 C12 H12 106.4 . . ?
 C11 C12 C13 112.3(2) . . ?
 C13 C12 H12 106.4 . . ?
 C14 C13 C12 107.3(2) . . ?
 C14 C13 C15 107.5(2) . . ?
 C14 C13 C17 109.0(2) . . ?
 C15 C13 C12 109.2(2) . . ?
 C15 C13 C17 111.8(3) . . ?
 C17 C13 C12 111.9(2) . . ?
 C8 C14 C13 126.2(2) . . ?
 C8 C14 H14 116.9 . . ?
 C13 C14 H14 116.9 . . ?
 C13 C15 H15 114.6 . . ?
 C16 C15 C13 130.7(5) . . ?
 C16 C15 H15 114.6 . . ?
 C15 C16 H16A 118(2) . . ?
 C15 C16 H16B 123(4) . . ?
 H16A C16 H16B 117(4) . . ?
 C13 C17 H17A 109.5 . . ?
 C13 C17 H17B 109.5 . . ?
 C13 C17 H17C 109.5 . . ?
 H17A C17 H17B 109.5 . . ?
 H17A C17 H17C 109.5 . . ?
 H17B C17 H17C 109.5 . . ?
 C4 C18 H18A 109.5 . . ?
 C4 C18 H18B 109.5 . . ?
 C4 C18 H18C 109.5 . . ?
 H18A C18 H18B 109.5 . . ?
 H18A C18 H18C 109.5 . . ?
 H18B C18 H18C 109.5 . . ?
 C4 C19 H19A 109.5 . . ?
 C4 C19 H19B 109.5 . . ?
 C4 C19 H19C 109.5 . . ?
 H19A C19 H19B 109.5 . . ?
 H19A C19 H19C 109.5 . . ?
 H19B C19 H19C 109.5 . . ?
 C10 C20 H20A 109.5 . . ?
 C10 C20 H20B 109.5 . . ?
 C10 C20 H20C 109.5 . . ?
 H20A C20 H20B 109.5 . . ?
 H20A C20 H20C 109.5 . . ?
 H20B C20 H20C 109.5 . . ?
 C12' O2' HC 109.5 . . ?
 HI C1' HJ 107.7 . . ?
 C2' C1' HI 108.9 . . ?
 C2' C1' HJ 108.9 . . ?
 C2' C1' C10' 113.2(2) . . ?
 C10' C1' HI 108.9 . . ?
 C10' C1' HJ 108.9 . . ?
 C1' C2' HO 109.6 . . ?
 C1' C2' HP 109.6 . . ?
 C1' C2' C3' 110.3(2) . . ?
 HO C2' HP 108.1 . . ?
 C3' C2' HO 109.6 . . ?
 C3' C2' HP 109.6 . . ?
 C2' C3' HM 108.8 . . ?
 C2' C3' HN 108.8 . . ?
 C2' C3' C4' 113.6(2) . . ?
 HM C3' HN 107.7 . . ?
 C4' C3' HM 108.8 . . ?
 C4' C3' HN 108.8 . . ?
 C3' C4' C5' 108.8(2) . . ?
 C3' C4' C19' 107.3(2) . . ?
 C18' C4' C3' 110.1(2) . . ?
 C18' C4' C5' 115.0(2) . . ?
 C18' C4' C19' 107.2(2) . . ?
 C19' C4' C5' 108.2(2) . . ?
 C4' C5' HB 105.0 . . ?
 C6' C5' C4' 113.09(19) . . ?
 C6' C5' HB 105.0 . . ?
 C6' C5' C10' 110.31(18) . . ?
 C10' C5' C4' 117.07(19) . . ?
 C10' C5' HB 105.0 . . ?
 C5' C6' HD 108.2 . . ?
 C5' C6' HE 108.2 . . ?
 HD C6' HE 107.3 . . ?
 C7' C6' C5' 116.47(18) . . ?
 C7' C6' HD 108.2 . . ?
 C7' C6' HE 108.2 . . ?
 O1' C7' C6' 120.6(2) . . ?
 O1' C7' C8' 120.9(2) . . ?
 C8' C7' C6' 118.42(18) . . ?
 C7' C8' C9' 118.21(19) . . ?
 C14' C8' C7' 118.57(19) . . ?
 C14' C8' C9' 123.2(2) . . ?
 C8' C9' HL 106.5 . . ?
 C8' C9' C10' 112.07(17) . . ?
 C8' C9' C11' 110.67(18) . . ?
 C10' C9' HL 106.5 . . ?
 C11' C9' HL 106.5 . . ?
 C11' C9' C10' 113.94(18) . . ?
 C1' C10' C5' 108.90(18) . . ?
 C1' C10' C9' 108.19(18) . . ?
 C1' C10' C20' 110.24(19) . . ?
 C5' C10' C9' 106.30(16) . . ?
 C20' C10' C5' 113.46(19) . . ?
 C20' C10' C9' 109.56(19) . . ?
 C9' C11' H 108.8 . . ?
 C9' C11' HA 108.8 . . ?
 H C11' HA 107.7 . . ?
 C12' C11' C9' 113.82(19) . . ?
 C12' C11' H 108.8 . . ?
 C12' C11' HA 108.8 . . ?
 O2' C12' C11' 110.2(2) . . ?
 O2' C12' HW 108.4 . . ?
 O2' C12' C13' 109.4(2) . . ?
 C11' C12' HW 108.4 . . ?
 C11' C12' C13' 111.8(2) . . ?
 C13' C12' HW 108.4 . . ?
 C12' C13' C17' 111.1(2) . . ?
 C14' C13' C12' 108.99(19) . . ?
 C14' C13' C15' 112.6(2) . . ?
 C14' C13' C17' 107.6(2) . . ?
 C15' C13' C12' 108.5(2) . . ?
 C15' C13' C17' 108.1(2) . . ?
 C8' C14' C13' 125.8(2) . . ?
 C8' C14' HK 117.1 . . ?
 C13' C14' HK 117.1 . . ?
 C13' C15' H0AA 115.3 . . ?
 C16' C15' C13' 129.5(3) . . ?
 C16' C15' H0AA 115.3 . . ?
 C15' C16' H4AA 114(2) . . ?
 C15' C16' H5AA 123(3) . . ?
 H4AA C16' H5AA 123(3) . . ?
 C13' C17' HQ 109.5 . . ?
 C13' C17' HR 109.5 . . ?
 C13' C17' HS 109.5 . . ?
 HQ C17' HR 109.5 . . ?
 HQ C17' HS 109.5 . . ?
 HR C17' HS 109.5 . . ?
 C4' C18' HX 109.5 . . ?
 C4' C18' HY 109.5 . . ?
 C4' C18' HZ 109.5 . . ?
 HX C18' HY 109.5 . . ?
 HX C18' HZ 109.5 . . ?
 HY C18' HZ 109.5 . . ?
 C4' C19' HT 109.5 . . ?
 C4' C19' HU 109.5 . . ?
 C4' C19' HV 109.5 . . ?
 HT C19' HU 109.5 . . ?
 HT C19' HV 109.5 . . ?
 HU C19' HV 109.5 . . ?
 C10' C20' HF 109.5 . . ?
 C10' C20' HG 109.5 . . ?
 C10' C20' HH 109.5 . . ?
 HF C20' HG 109.5 . . ?
 HF C20' HH 109.5 . . ?
 HG C20' HH 109.5 . . ?
 N1 C21 C22 178.8(4) . . ?
 C21 C22 H1AA 109.5 . . ?
 C21 C22 H2AA 109.5 . . ?
 C21 C22 H3AA 109.5 . . ?
 H1AA C22 H2AA 109.5 . . ?
 H1AA C22 H3AA 109.5 . . ?
 H2AA C22 H3AA 109.5 . . ?

loop_
  _geom_torsion_atom_site_label_1
  _geom_torsion_atom_site_label_2
  _geom_torsion_atom_site_label_3
  _geom_torsion_atom_site_label_4
  _geom_torsion
  _geom_torsion_site_symmetry_1
  _geom_torsion_site_symmetry_2
  _geom_torsion_site_symmetry_3
  _geom_torsion_site_symmetry_4
  _geom_torsion_publ_flag
 O1 C7 C8 C9 162.2(2) . . . . ?
 O1 C7 C8 C14 -17.3(3) . . . . ?
 O2 C12 C13 C14 176.3(2) . . . . ?
 O2 C12 C13 C15 -67.5(3) . . . . ?
 O2 C12 C13 C17 56.8(3) . . . . ?
 C1 C2 C3 C4 57.5(3) . . . . ?
 C2 C1 C10 C5 50.1(3) . . . . ?
 C2 C1 C10 C9 165.4(2) . . . . ?
 C2 C1 C10 C20 -74.9(3) . . . . ?
 C2 C3 C4 C5 -54.0(3) . . . . ?
 C2 C3 C4 C18 72.0(3) . . . . ?
 C2 C3 C4 C19 -171.8(2) . . . . ?
 C3 C4 C5 C6 -178.11(19) . . . . ?
 C3 C4 C5 C10 51.4(3) . . . . ?
 C4 C5 C6 C7 -177.43(19) . . . . ?
 C4 C5 C10 C1 -49.5(3) . . . . ?
 C4 C5 C10 C9 -166.26(18) . . . . ?
 C4 C5 C10 C20 73.8(2) . . . . ?
 C5 C6 C7 O1 -160.2(2) . . . . ?
 C5 C6 C7 C8 21.5(3) . . . . ?
 C6 C5 C10 C1 179.29(19) . . . . ?
 C6 C5 C10 C9 62.5(2) . . . . ?
 C6 C5 C10 C20 -57.4(2) . . . . ?
 C6 C7 C8 C9 -19.5(3) . . . . ?
 C6 C7 C8 C14 161.0(2) . . . . ?
 C7 C8 C9 C10 39.9(3) . . . . ?
 C7 C8 C9 C11 169.68(19) . . . . ?
 C7 C8 C14 C13 177.8(2) . . . . ?
 C8 C9 C10 C1 -177.26(18) . . . . ?
 C8 C9 C10 C5 -60.3(2) . . . . ?
 C8 C9 C10 C20 62.2(2) . . . . ?
 C8 C9 C11 C12 42.0(3) . . . . ?
 C9 C8 C14 C13 -1.7(4) . . . . ?
 C9 C11 C12 O2 168.3(2) . . . . ?
 C9 C11 C12 C13 -63.9(3) . . . . ?
 C10 C1 C2 C3 -55.5(3) . . . . ?
 C10 C5 C6 C7 -44.2(3) . . . . ?
 C10 C9 C11 C12 170.11(18) . . . . ?
 C11 C9 C10 C1 55.1(2) . . . . ?
 C11 C9 C10 C5 172.01(18) . . . . ?
 C11 C9 C10 C20 -65.5(2) . . . . ?
 C11 C12 C13 C14 48.4(3) . . . . ?
 C11 C12 C13 C15 164.7(2) . . . . ?
 C11 C12 C13 C17 -71.0(3) . . . . ?
 C12 C13 C14 C8 -16.7(3) . . . . ?
 C12 C13 C15 C16 135.2(5) . . . . ?
 C14 C8 C9 C10 -140.6(2) . . . . ?
 C14 C8 C9 C11 -10.9(3) . . . . ?
 C14 C13 C15 C16 -108.7(6) . . . . ?
 C15 C13 C14 C8 -134.1(3) . . . . ?
 C17 C13 C14 C8 104.6(3) . . . . ?
 C17 C13 C15 C16 10.9(6) . . . . ?
 C18 C4 C5 C6 58.9(3) . . . . ?
 C18 C4 C5 C10 -71.6(3) . . . . ?
 C19 C4 C5 C6 -61.7(3) . . . . ?
 C19 C4 C5 C10 167.8(2) . . . . ?
 O1' C7' C8' C9' 163.91(19) . . . . ?
 O1' C7' C8' C14' -17.1(3) . . . . ?
 O2' C12' C13' C14' 169.0(2) . . . . ?
 O2' C12' C13' C15' -68.0(3) . . . . ?
 O2' C12' C13' C17' 50.7(3) . . . . ?
 C1' C2' C3' C4' 58.5(3) . . . . ?
 C2' C1' C10' C5' 52.6(3) . . . . ?
 C2' C1' C10' C9' 167.7(2) . . . . ?
 C2' C1' C10' C20' -72.5(3) . . . . ?
 C2' C3' C4' C5' -51.9(3) . . . . ?
 C2' C3' C4' C18' 75.0(3) . . . . ?
 C2' C3' C4' C19' -168.7(2) . . . . ?
 C3' C4' C5' C6' 178.1(2) . . . . ?
 C3' C4' C5' C10' 48.1(3) . . . . ?
 C4' C5' C6' C7' 179.72(19) . . . . ?
 C4' C5' C10' C1' -48.5(3) . . . . ?
 C4' C5' C10' C9' -164.81(18) . . . . ?
 C4' C5' C10' C20' 74.7(3) . . . . ?
 C5' C6' C7' O1' -159.67(19) . . . . ?
 C5' C6' C7' C8' 23.7(3) . . . . ?
 C6' C5' C10' C1' -179.68(18) . . . . ?
 C6' C5' C10' C9' 64.0(2) . . . . ?
 C6' C5' C10' C20' -56.5(2) . . . . ?
 C6' C7' C8' C9' -19.5(3) . . . . ?
 C6' C7' C8' C14' 159.5(2) . . . . ?
 C7' C8' C9' C10' 38.6(2) . . . . ?
 C7' C8' C9' C11' 166.97(18) . . . . ?
 C7' C8' C14' C13' -175.8(2) . . . . ?
 C8' C9' C10' C1' -176.73(18) . . . . ?
 C8' C9' C10' C5' -59.9(2) . . . . ?
 C8' C9' C10' C20' 63.1(2) . . . . ?
 C8' C9' C11' C12' 39.9(3) . . . . ?
 C9' C8' C14' C13' 3.1(3) . . . . ?
 C9' C11' C12' O2' 178.43(19) . . . . ?
 C9' C11' C12' C13' -59.6(3) . . . . ?
 C10' C1' C2' C3' -58.6(3) . . . . ?
 C10' C5' C6' C7' -47.0(3) . . . . ?
 C10' C9' C11' C12' 167.24(19) . . . . ?
 C11' C9' C10' C1' 56.6(2) . . . . ?
 C11' C9' C10' C5' 173.46(17) . . . . ?
 C11' C9' C10' C20' -63.6(2) . . . . ?
 C11' C12' C13' C14' 46.7(3) . . . . ?
 C11' C12' C13' C15' 169.6(2) . . . . ?
 C11' C12' C13' C17' -71.7(3) . . . . ?
 C12' C13' C14' C8' -20.1(3) . . . . ?
 C12' C13' C15' C16' -110.1(5) . . . . ?
 C14' C8' C9' C10' -140.3(2) . . . . ?
 C14' C8' C9' C11' -11.9(3) . . . . ?
 C14' C13' C15' C16' 10.6(5) . . . . ?
 C15' C13' C14' C8' -140.5(2) . . . . ?
 C17' C13' C14' C8' 100.4(3) . . . . ?
 C17' C13' C15' C16' 129.4(4) . . . . ?
 C18' C4' C5' C6' 54.1(3) . . . . ?
 C18' C4' C5' C10' -75.9(3) . . . . ?
 C19' C4' C5' C6' -65.7(3) . . . . ?
 C19' C4' C5' C10' 164.4(2) . . . . ?

_olex2_submission_special_instructions 'No special instructions were received'
